# Supplementary material for: DeepMeSH: deep semantic representation for improving large-scale MeSH indexing
Source: PubMed Central journal article supplement — Bioinformatics. 2016 Jun 11;32(12):i70–9. doi: 10.1093/bioinformatics/btw294 (PMC4908368; doi:10.1093/bioinformatics/btw294), 2016-06-11
Supplement: supp_btw294_zhu.207.sup.pdf [file supp_btw294_zhu.207.sup.pdf]

# Supplementary materials

Table 1: Performance comparison of KNNs with different feature representations. (p-values are shown in the parentheses)

| Method               | MiP                  | MiR                  | MiF                  | EBP                  | EBR                  | EBF                  | MaP                  | MaR                  | MaF                  |
|----------------------|----------------------|----------------------|----------------------|----------------------|----------------------|----------------------|----------------------|----------------------|----------------------|
| KNN <sub>TFIDF</sub> | 0.4369<br>(2.95E-39) | 0.4455<br>(2.09E-39) | 0.4412<br>(2.48E-39) | 0.4362<br>(9.30E-34) | 0.4547<br>(3.96E-29) | 0.4317<br>(1.59E-32) | <b>0.3274</b>        | <b>0.2960</b>        | <b>0.3109</b>        |
| KNN <sub>W2V</sub>   | 0.4133<br>(2.40E-70) | 0.4215<br>(1.30E-70) | 0.4174<br>(1.66E-70) | 0.4083<br>(1.05E-69) | 0.4216<br>(5.55E-73) | 0.4027<br>(1.92E-71) | 0.1438<br>(5.06E-92) | 0.1230<br>(6.25E-92) | 0.1326<br>(1.15E-93) |
| KNN <sub>WW2V</sub>  | <b>0.4477</b>        | <b>0.4565</b>        | <b>0.4521</b>        | <b>0.4444</b>        | <b>0.4616</b>        | <b>0.4394</b>        | 0.2332               | 0.2126               | 0.2225               |
| KNN <sub>W2P</sub>   | 0.4027<br>(6.11E-78) | 0.4106<br>(7.22E-78) | 0.4066<br>(5.82E-78) | 0.3968<br>(2.79E-76) | 0.4098<br>(7.88E-79) | 0.3914<br>(4.72E-78) | 0.1201<br>(1.59E-92) | 0.1018<br>(1.32E-92) | 0.1102<br>(8.53E-94) |
| KNN <sub>WW2P</sub>  | 0.4392<br>(5.47E-45) | 0.4478<br>(5.73E-45) | 0.4435<br>(5.57E-45) | 0.4351<br>(6.09E-44) | 0.4515<br>(3.74E-45) | 0.4300<br>(9.24E-45) | 0.1970<br>(6.05E-81) | 0.1786<br>(3.59E-80) | 0.1873<br>(1.28E-81) |
| KNN <sub>D2V</sub>   | 0.4271<br>(4.24E-59) | 0.4355<br>(1.82E-59) | 0.4313<br>(2.74E-59) | 0.4207<br>(4.10E-59) | 0.4361<br>(1.30E-59) | 0.4156<br>(6.20E-60) | 0.1726<br>(5.06E-86) | 0.1450<br>(1.80E-86) | 0.1576<br>(1.16E-87) |

Table 2: Performance comparison of KNNs with the combination of different feature representations. (p-values are shown in the parentheses)

| Method                    | MiP                  | MiR                  | MiF                  | EBP                  | EBR                  | EBF                  | MaP                  | MaR                  | MaF                  |
|---------------------------|----------------------|----------------------|----------------------|----------------------|----------------------|----------------------|----------------------|----------------------|----------------------|
| KNN <sub>W2V-TFIDF</sub>  | 0.4526<br>(3.84E-72) | 0.4615<br>(7.60E-73) | 0.4570<br>(1.55E-72) | 0.4516<br>(3.21E-72) | 0.4710<br>(6.78E-72) | 0.4472<br>(3.26E-72) | 0.3359<br>(6.80E-42) | 0.3027<br>(1.12E-50) | 0.3185<br>(2.71E-49) |
| KNN <sub>WW2V-TFIDF</sub> | 0.4602<br>(2.32E-64) | 0.4693<br>(1.63E-64) | 0.4647<br>(1.84E-64) | 0.4593<br>(2.24E-62) | 0.4793<br>(3.38E-61) | 0.4549<br>(3.94E-62) | 0.3412<br>(5.74E-25) | 0.3091<br>(1.63E-37) | 0.3244<br>(9.08E-34) |
| KNN <sub>W2P-TFIDF</sub>  | 0.4750<br>(1.30E-30) | 0.4844<br>(1.23E-30) | 0.4797<br>(1.26E-30) | 0.4752<br>(3.25E-27) | 0.4951<br>(1.26E-25) | 0.4702<br>(3.71E-27) | 0.3371<br>(1.36E-37) | 0.3054<br>(3.43E-45) | 0.3205<br>(2.33E-43) |
| KNN <sub>WW2P-TFIDF</sub> | 0.4768<br>(1.30E-18) | 0.4862<br>(1.25E-18) | 0.4814<br>(1.27E-18) | 0.4764<br>(7.57E-20) | 0.4963<br>(1.99E-19) | 0.4714<br>(2.02E-20) | 0.3398<br>(5.73E-27) | 0.3095<br>(3.65E-33) | 0.3239<br>(2.52E-31) |
| KNN <sub>D2V-TFIDF</sub>  | <b>0.4784</b>        | <b>0.4878</b>        | <b>0.4831</b>        | <b>0.4783</b>        | <b>0.4983</b>        | <b>0.4733</b>        | <b>0.3468</b>        | <b>0.3171</b>        | <b>0.3313</b>        |

Table 3: Comparison of binary relevance approaches with different features. (p-values are shown in the parentheses)

| Method                  | MiP                   | MiR                   | MiF                   | EBP                  | EBR                   | EBF                   | MaP                   | MaR                   | MaF                   |
|-------------------------|-----------------------|-----------------------|-----------------------|----------------------|-----------------------|-----------------------|-----------------------|-----------------------|-----------------------|
| BC <sub>D2V</sub>       | 0.4395<br>(1.99E-101) | 0.4482<br>(1.51E-103) | 0.4438<br>(3.11E-103) | 0.4339<br>(1.00E-99) | 0.4519<br>(3.09E-100) | 0.4294<br>(1.06E-100) | 0.1627<br>(1.16E-101) | 0.1706<br>(4.48E-102) | 0.1666<br>(8.15E-101) |
| BC <sub>TFIDF</sub>     | 0.5584<br>(2.68E-78)  | 0.5694<br>(3.46E-78)  | 0.5638<br>(2.52E-78)  | 0.5575<br>(1.39E-77) | 0.5892<br>(1.68E-75)  | 0.5556<br>(4.82E-77)  | 0.4662<br>(2.52E-30)  | <b>0.4970</b>         | <b>0.4811</b>         |
| BC <sub>normTFIDF</sub> | 0.5716<br>(5.80E-71)  | 0.5829<br>(1.69E-70)  | 0.5772<br>(8.98E-71)  | 0.5704<br>(9.55E-70) | 0.5991<br>(1.44E-69)  | 0.5667<br>(1.06E-69)  | 0.4463<br>(9.72E-56)  | 0.4402<br>(1.98E-76)  | 0.4432<br>(2.13E-66)  |
| BC <sub>D2V-TFIDF</sub> | <b>0.5974</b>         | <b>0.6092</b>         | <b>0.6033</b>         | <b>0.5983</b>        | <b>0.6280</b>         | <b>0.5943</b>         | <b>0.4741</b>         | 0.4633<br>(1.26E-60)  | 0.4686<br>(4.44E-41)  |

Table 4: Performance improvement of MeSHRanker by incorporating deep semantic representation (p-values are shown in the parentheses)

| Method                      | MiP                  | MiR                  | MiF                  | EBP                  | EBR                  | EBF                  | MaP                  | MaR                  | MaF                  |
|-----------------------------|----------------------|----------------------|----------------------|----------------------|----------------------|----------------------|----------------------|----------------------|----------------------|
| MITIDF                      | 0.5753<br>(9.79E-65) | 0.5526<br>(1.21E-85) | 0.5637<br>(4.89E-80) | 0.5838<br>(1.89E-60) | 0.5737<br>(3.06E-86) | 0.5566<br>(5.74E-79) | 0.4939<br>(1.31E-63) | 0.5140<br>(6.01E-62) | 0.5037<br>(1.22E-64) |
| BC <sub>D2V</sub> -TFIDF    | 0.5974<br>(1.23E-67) | 0.6092<br>(1.94E-67) | 0.6033<br>(1.46E-67) | 0.5983<br>(2.73E-68) | 0.6280<br>(1.90E-68) | 0.5943<br>(9.79E-69) | 0.4741<br>(8.21E-74) | 0.4633<br>(5.35E-86) | 0.4686<br>(9.07E-82) |
| MeSHRanker                  | 0.6067<br>(4.56E-55) | 0.6187<br>(1.65E-55) | 0.6126<br>(2.73E-55) | 0.6091<br>(4.86E-50) | 0.6400<br>(6.68E-51) | 0.6053<br>(5.32E-51) | 0.5249<br>(6.30E-46) | 0.5400<br>(1.93E-46) | 0.5323<br>(1.02E-47) |
| + Step 2 of DeepMeSH        | 0.6156<br>(1.29E-17) | 0.6278<br>(1.28E-17) | 0.6216<br>(1.30E-17) | 0.6180<br>(3.21E-16) | 0.6492<br>(3.18E-18) | 0.6141<br>(2.84E-17) | 0.5361<br>(3.20E-19) | 0.5476<br>(1.38E-30) | 0.5418<br>(3.88E-27) |
| + Steps 1 and 2 of DeepMeSH | <b>0.6164</b>        | <b>0.6286</b>        | <b>0.6224</b>        | <b>0.6188</b>        | <b>0.6501</b>        | <b>0.6149</b>        | <b>0.5380</b>        | <b>0.5505</b>        | <b>0.5442</b>        |
